# Supplementary material
Source: Elsevier journal article supplement (https://www.sciencedirect.com/science/article/pii/S2529984017300083)
Supplement: mmc1 [file S2529984017300083:mmc1.pdf]

**Tabla 1. Diseño y contenidos principales de los estudios incluidos en la revisión**

| Primer autor, año de publicación | Diseño estudio y muestra                                                          | Factor de riesgo identificado                                                                                                                                                                                                                                                                                               | Estrategia preventiva propuesta                                                                                                                                                                                                                                                                                                                                                                                                                                         |
|----------------------------------|-----------------------------------------------------------------------------------|-----------------------------------------------------------------------------------------------------------------------------------------------------------------------------------------------------------------------------------------------------------------------------------------------------------------------------|-------------------------------------------------------------------------------------------------------------------------------------------------------------------------------------------------------------------------------------------------------------------------------------------------------------------------------------------------------------------------------------------------------------------------------------------------------------------------|
| Schallom M, 2015                 | Cuasiexperimental en 200 pacientes de UCI                                         | A los 85 minutos de exposición a la interfaz detectan lesiones                                                                                                                                                                                                                                                              | A favor del uso de apósitos para proteger la piel (sobretudo puente nasal): films transparentes, siliconas, thin foams o hidrocoloides<br>Recomiendan la rotación de la interfase<br>La máscara de elección debería ser la facial (mejor tolerada y menos lesiones que la máscara oronasal)<br>Evaluar estado de la piel mínimo cada 12h y cada vez que se recoloca la interfaz<br>Tiempo mínimo de descanso entre aplicaciones: 10 minutos para dejar oxigenar la piel |
| Tayyib N, 2015                   | Ensayo clínico aleatorizado en 140 pacientes de UCI                               | No evalúa ninguno                                                                                                                                                                                                                                                                                                           | Cambiar regularmente de posición los dispositivos médicos para evitar lesiones<br>Evaluar piel y mucosas cada 12h y cada vez que se recolque el dispositivo                                                                                                                                                                                                                                                                                                             |
| Yamaguti WP, 2014                | Observacional prospectivo en 375 pacientes de UCI y unidades cuidados intermedios | Los pacientes que presentaron LADM tenían más número total de aplicaciones de VNI superiores a las 2h que los que no desarrollaron lesiones ( $7,1 \pm 13,3$ vs $4,4 \pm 7,5$ , $P=0,03$ )<br>En horas totales VNI, también presentaron diferencias significativas ( $44,6 \pm 118,5$ horas vs $21,8 \pm 45,5$ , $P=0,01$ ) | Usan apósitos para proteger puentes nasal<br>La máscara de elección debería ser la facial porque provoca menos lesiones                                                                                                                                                                                                                                                                                                                                                 |

|                  |                                                                                      |                                                                                                                                                                                                       |                                                                                                                                                                                                                                                                                                                                                                                                                                              |
|------------------|--------------------------------------------------------------------------------------|-------------------------------------------------------------------------------------------------------------------------------------------------------------------------------------------------------|----------------------------------------------------------------------------------------------------------------------------------------------------------------------------------------------------------------------------------------------------------------------------------------------------------------------------------------------------------------------------------------------------------------------------------------------|
|                  |                                                                                      | A partir de las 26 horas de VNI el riesgo de lesión aumenta 8,62 veces (IC 95% [2,3 – 32,1]<br>Con la máscara oronasal 80,8 (IC 95% [19,6 – 332,6] más veces riesgo de lesión comparado con la facial |                                                                                                                                                                                                                                                                                                                                                                                                                                              |
| Maruccia M, 2013 | Caso clínico                                                                         | El material de la interfaz debe ser lo máximo maleable posible, para adaptarse al contorno de la cara y nariz                                                                                         | A favor del uso de apósitos hidrocoloides para mejorar la zona de contacto entre máscara y piel<br>No apretar la máscara en exceso para evitar lesiones en zonas con poco tejido subcutáneo como por ejemplo el puente nasal<br>Evaluar la piel cada 3-4 horas para detectar las lesiones en estado precoz                                                                                                                                   |
| Lemyze M, 2013   | Observacional prospectivo en 573 pacientes de UCI y unidades de cuidados intermedios | A las 11 h seguidas de aplicación de la VNI comienzan las lesiones (sensibilidad 84%, especificidad 71%)                                                                                              | Los apósitos no evitan las lesiones en pacientes con más de 12h de exposición de la máscara (53,3% de los pacientes con más de 12h VNI presentan lesiones comparado con 9,5% de los pacientes con menos de 12h)<br>Evaluar la piel siempre que se retira o recoloca la máscara. Un enrojecimiento que no desaparece en 30 minutos se debe considerar grado I<br>Evaluar también las lesiones asociadas al arnés, principalmente en occipital |
| Ahmad Z, 2013    | Casos clínicos                                                                       | No evalúa ninguno                                                                                                                                                                                     | Valorar el estado basal de la piel del                                                                                                                                                                                                                                                                                                                                                                                                       |

|                   |                                                                             |                                                                                                                                                                             |                                                                                                                                                                                                                                                                                                                                       |
|-------------------|-----------------------------------------------------------------------------|-----------------------------------------------------------------------------------------------------------------------------------------------------------------------------|---------------------------------------------------------------------------------------------------------------------------------------------------------------------------------------------------------------------------------------------------------------------------------------------------------------------------------------|
|                   |                                                                             |                                                                                                                                                                             | <p>paciente para individualizar los cuidados</p> <p>Importante la experiencia del equipo en la selección y talla adecuada de la interfaz. No apretarla contra la cara del paciente</p> <p>Usar apósitos protege la piel</p> <p>Evaluar la piel cada 2 horas</p>                                                                       |
| Racca F, 2009     | Casos clínicos                                                              | No evalúa ninguno                                                                                                                                                           | <p>Recomiendan el uso del Helmet cuando el paciente comenta disconfort con otra interfaz y principalmente cuando presenta lesiones que impiden el uso de la máscara facial o oronasal</p> <p>Usar apósitos para proteger el puente nasal</p> <p>Colocar la máscara que permita el paso de 2 dedos entre arnés y cara del paciente</p> |
| Weng MH, 2008     | Ensayo clínico aleatorizado en 90 pacientes de UCI                          | Factores que alteran el estado basal de la piel: edad avanzada, niveles bajos de hemoglobina y albúmina, alteración de la fórmula leucocitaria                              | <p>Recomienda el uso de apósitos cuando se utiliza la máscara oronasal porque evitan el desplazamiento de la máscara por la humedad y/o el peso de la gravedad, evitando tener que apretarla y con ello disminuir la presión-fricción-cizalla sobre el puente nasal</p>                                                               |
| Visscher MO, 2015 | Observacional prospectivo en 50 adultos y niños (edades entre [0,1 – 32,5]) | Factores relacionados con el material de la interfase: principalmente de plástico y no transpirables. Si fueran por lo menos transpirables o de tejido, disminuiría humedad | <p>Recomiendan el uso de un apósito de espuma de silicona (Mepilex Lite) con 90%/10% apósito hidrocoloide (Vigilon, Bard) para disminuir</p>                                                                                                                                                                                          |

|                                                                                     |                                               |                                                                                                                                                                                                                                                                                                                                             |                                                                                                                                                                                                                                                                                                                                                  |
|-------------------------------------------------------------------------------------|-----------------------------------------------|---------------------------------------------------------------------------------------------------------------------------------------------------------------------------------------------------------------------------------------------------------------------------------------------------------------------------------------------|--------------------------------------------------------------------------------------------------------------------------------------------------------------------------------------------------------------------------------------------------------------------------------------------------------------------------------------------------|
|                                                                                     |                                               | en las zonas de contacto y con ello menos riesgo de lesión                                                                                                                                                                                                                                                                                  | <p>humedad en la piel</p> <p>A favor de la rotación de la interfase para alternar los puntos de presión</p> <p>La máscara oronasal provoca más lesiones profundas en el puente nasal y en las mejillas que la máscara facial</p> <p>Evaluar piel cada 4h en el momento de recolocar la máscara</p>                                               |
| Munckton K, 2007                                                                    | Observacional prospectivo en 12 adultos sanos | <p>Factores que alteran el estado basal de la piel: deficiencia de vitamina D, administración de corticoesteroides</p> <p>En modalidad CPAP (sistema Whisperflow, no mecánico) a más nivel de CPAP menos presión sobre el puente nasal porque la máscara flota sobre la superficie comparado con menores niveles de presión espiratoria</p> | <p>Recomiendan uso de apósitos</p> <p>No hinchar en exceso los cojines de la máscara porque cuando más aire contienen menos distensibles son, provocando que sean pocos los puntos de presión sobre los que se apoya la máscara.</p> <p>Recomienda el uso del Helmet antes que la máscara oronasal para disminuir presión sobre puente nasal</p> |
| Royal College of Physicians, British Thoracic Society, Intensive Care Society, 2008 | Guía clínica                                  | No evalúa ninguno                                                                                                                                                                                                                                                                                                                           | <p>Recomienda el uso de apósitos para disminuir lesiones en puente nasal (sin nivel de evidencia)</p> <p>Recomiendan el uso de la facial durante las primeras 24 horas de VNI (grado de recomendación C)</p> <p>Importante usar los medidores de talla que se comercializan con las interfases</p>                                               |
| Diez T, 2015                                                                        | Revisión bibliográfica                        | No evalúa ninguno                                                                                                                                                                                                                                                                                                                           | <p>Recomienda el uso de apósitos para disminuir presión y fricción</p> <p>También el uso de cojines hinchables</p>                                                                                                                                                                                                                               |

|                |                                                        |                                                                                                                                                                                                                                                                                                                     |                                                                                                                                                                                                                                                                                                                                                                                                                                                                              |
|----------------|--------------------------------------------------------|---------------------------------------------------------------------------------------------------------------------------------------------------------------------------------------------------------------------------------------------------------------------------------------------------------------------|------------------------------------------------------------------------------------------------------------------------------------------------------------------------------------------------------------------------------------------------------------------------------------------------------------------------------------------------------------------------------------------------------------------------------------------------------------------------------|
|                |                                                        |                                                                                                                                                                                                                                                                                                                     | y soporte en la cabeza para disminuir presión sobre el puente nasal cuando se usa la máscara oronasal, así como no apretar la máscara<br>A favor de la rotación de la interfaz<br>Priorizar el uso de la facial ante la oronasal                                                                                                                                                                                                                                             |
| Black J, 2015  | Panel de expertos                                      | Factores relacionados con el material de la interfase: material rígido y no elástico aumenta la fricción sobre la piel y mucosas; arnés con cintas adhesivas para fijar la máscara puede irritar la piel en zonas donde se haya formado edema<br>La humedad aumenta el riesgo de lesiones por maceración de la piel | Recomienda uso de films y apósitos hidrocoloides para absorber la humedad y si no hay humedad, espumas para disminuir la presión.<br>A favor de incorporar cojines hinchables para que el material de la interfaz sea más elástico<br>Evitar poner un nuevo apósito cuando hay lesión porque solo dañará más la piel. Se debe cambiar de interfaz para rotar los puntos de presión.<br>Importante la experiencia del equipo en la selección y talla adecuada de la interfaz. |
| Coyer FM, 2013 | Observacional prospectivo en 483 pacientes de UCI      | No evalúa ninguno                                                                                                                                                                                                                                                                                                   | Importante evaluar la piel debajo el dispositivo pero también las mucosas, porque resultan igual de dañadas.                                                                                                                                                                                                                                                                                                                                                                 |
| Apold J, 2012  | Observacional transversal en 5 hospitales de Minnesota | Es un factor de riesgo de lesiones la falta de formación del staff en como colocar adecuadamente el dispositivo y cuando apretado debe estar contra la piel para funcionar óptimamente                                                                                                                              | La prescripción médica de no remover el dispositivo puede retardar la evaluación de la piel y mucosas en contacto con el mismo. Debe individualizarse al paciente y                                                                                                                                                                                                                                                                                                          |

|                  |                                                                                      |                                                                                                                                                                                                                                         |                                                                                                                                                                                                                              |
|------------------|--------------------------------------------------------------------------------------|-----------------------------------------------------------------------------------------------------------------------------------------------------------------------------------------------------------------------------------------|------------------------------------------------------------------------------------------------------------------------------------------------------------------------------------------------------------------------------|
|                  |                                                                                      |                                                                                                                                                                                                                                         | formar el staff en el uso del dispositivo en particular                                                                                                                                                                      |
| Cooper KL, 2013  | Revisión bibliográfica                                                               | Es una factor de riesgo la falta de formación de las enfermeras en el uso de los dispositivos                                                                                                                                           | Recomiendan uso de apósitos para disminuir la presión en el puente nasal.<br>A favor de la rotación de la interfaz y de no apretar la misma contra la cara del paciente                                                      |
| Silva RM, 2013   | Observacional prospectivo en 245 pacientes de UCI y unidades de cuidados intermedios | La máscara facial se adapta a la cara en el 75,5% de los pacientes comparado con el 80% la máscara oronasal, sin diferencias entre ellas. En los casos en qué la facial no se adapta, en el 30,5% de ellos es por la forma de la nariz. | Falta desarrollar más modelos de máscara facial en función de las formas de la nariz.<br>Recomiendan la facial como primera elección porque causa menos dolor en el puente nasal.                                            |
| Holanda MA, 2009 | Ensayo clínico no aleatorizado en 24 adultos sanos                                   | No evalúan ninguno                                                                                                                                                                                                                      | Recomiendan la facial porque distribuye en más puntos la presión y no provoca tanto dolor sobre el puente nasal como la oronasal, aunque se relaciona con más claustrofobia                                                  |
| Chacur Fh, 2011  | Ensayo clínico aleatorizado en 60 pacientes de UCI                                   | La facial es más bien tolerada que la oronasal (87% vs 46%, $P<0,001$ ) en una escala de Likert del 0 al 5.                                                                                                                             | Recomiendan la facial como primera opción por ser mejor tolerada, incluso por delante del Helmet cuando hay lesiones porque este acumula más dióxido de carbono y se relaciona con deficiente sincronía paciente-ventilador. |
| Orenay OM, 2013  | Caso clínico                                                                         |                                                                                                                                                                                                                                         | Recomiendan no apretar en exceso la máscara porque es causa de lesiones pero tampoco dejarla demasiado floja porque aumenta                                                                                                  |

|                         |                                                                                                                                                        |                                                                                                                                                                                                                                                                                                                                                                                                                                                                                                                                                                                                                                                                                                                                     |                                                                                                                                                                                                                                                                                               |
|-------------------------|--------------------------------------------------------------------------------------------------------------------------------------------------------|-------------------------------------------------------------------------------------------------------------------------------------------------------------------------------------------------------------------------------------------------------------------------------------------------------------------------------------------------------------------------------------------------------------------------------------------------------------------------------------------------------------------------------------------------------------------------------------------------------------------------------------------------------------------------------------------------------------------------------------|-----------------------------------------------------------------------------------------------------------------------------------------------------------------------------------------------------------------------------------------------------------------------------------------------|
|                         |                                                                                                                                                        |                                                                                                                                                                                                                                                                                                                                                                                                                                                                                                                                                                                                                                                                                                                                     | demasiado la fuga. Usar apósitos para proteger el puente nasal.                                                                                                                                                                                                                               |
| Raurell-Torredà M, 2016 | Observacional prospectivo en 387 pacientes de UCI, unidades de cuidados intermedios (urgencias y reanimación posquirúrgica) y salas de hospitalización | <p>El exceso de fuga no intencionada se relaciona con la aparición de lesiones cutáneas (OR 2,4 [IC 95% 1,1 – 5,3]) pues es causa de que se ciña la máscara más fuerte a la cara del paciente (OR 1,1 [IC 95% 1,02 – 1,17])</p> <p>La máscara oronasal provoca más fuga no intencionada que la facial (OR 3,5 [IC 95% 1,1 – 11,3])</p> <p>La intolerancia a la interfase se relaciona con el uso de ventiladores convencionales de UCI (OR 4,4 [95% CI 2,1 – 9,2]).</p> <p>El riesgo de lesiones es más alto en aquellas unidades dónde los profesionales opinan mayormente que es correcto apretar la máscara a la cara del paciente para conseguir una mejor sincronización paciente-ventilador (OR 1,1 [IC 95% 1,01 – 1,18])</p> | <p>Indican la máscara facial como la primera opción porque fuga menos que la oronasal con lo cual las enfermeras no la aprietan contra la cara del paciente.</p> <p>El uso de apósitos no fue significativo en la regresión logística, por lo que no se puede hacer ninguna recomendación</p> |

Máscara oronasal o nasobucal: cubre la nariz y la boca / Máscara facial: cubre ojos, nariz y boca

LESADIC: lesiones asociadas a dispositivos clínicos
