# Supplementary material
Source: Elsevier journal article supplement (https://www.sciencedirect.com/science/article/pii/S2529984017300083)
Supplement: mmc2 [file S2529984017300083:mmc2.pdf]

**Tabla 2: Tratamiento de las lesiones cutáneas asociadas a la VNI**

| Primer autor, año de publicación | Diseño estudio y muestra                                          | Tratamiento de las lesiones                                                                                                                                                                                                                                  |
|----------------------------------|-------------------------------------------------------------------|--------------------------------------------------------------------------------------------------------------------------------------------------------------------------------------------------------------------------------------------------------------|
| Maruccia M et al., 2013          | 2 Casos clínicos (28 semanas, 71 años)                            | Antisepsia de las lesiones con solución de hipoclorito (0.5%), limpieza con suero fisiológico para disminuir toxicidad del antiséptico, aplicación de crema con hialuronato sódico, protegido con apósito de gasa impregnada de crema de hialuronato sódico. |
| Orenay OM et al., 2013           | Caso clínico (88 años)                                            | Pomada de centella asiática y apósito protector (no indica cuál).                                                                                                                                                                                            |
| NPUAP, 2014                      | Recomendaciones de tratamiento basadas en la evidencia disponible | Incluye recomendaciones relacionadas con la clasificación y monitoraje de las UPP, manejo del dolor, limpieza, y desbridamiento de la herida, signos de infección y uso de apósitos.                                                                         |
